# Supplementary material for: The first synthesis of organosilyl-substituted aluminophosphate molecular sieves
Source: Royal Society of Chemistry journal article supplement (doi:10.1039/b613454h), 2006-10-26
Supplement: esi.pdf [file esi.pdf]

## Supplementary Information

### The first synthesis of organosilyl-substituted aluminophosphate molecular sieves

Kazuyuki Maeda, Yuji Mito, Tetsuya Yanagase, Sarah Haraguchi, Tsutomu Yamazaki and Takeyuki Suzuki

**Table S1** Compositions of as-synthesized Me-Si- $\text{AlPO}_4\text{-5}$  and organosilyl VPI-5 samples calculated from ICP-AES analysis.

| OAS                                             | $\text{Al}_2\text{O}_3$ | $\text{P}_2\text{O}_5$ | (R)SiO <sub>1.5</sub> |
|-------------------------------------------------|-------------------------|------------------------|-----------------------|
| <b>MeSi-<math>\text{AlPO}_4\text{-5}</math></b> |                         |                        |                       |
| 0.6                                             | 1                       | 1.02                   | 0.08                  |
| 0.8                                             | 1                       | 0.97                   | 0.13                  |
| 1.0                                             | 1                       | 0.98                   | 0.18                  |
| <b>MeSi-VPI-5</b>                               |                         |                        |                       |
| 0.1                                             | 1                       | 0.99                   | 0.021                 |
| 0.2                                             | 1                       | 1.05                   | 0.038                 |
| <b>bisSi-VPI-5</b>                              |                         |                        |                       |
| 0.05                                            | 1                       | 0.99                   | 0.037                 |
| 0.10                                            | 1                       | 1.01                   | 0.084                 |
| 0.15                                            | 1                       | 0.99                   | 0.096                 |

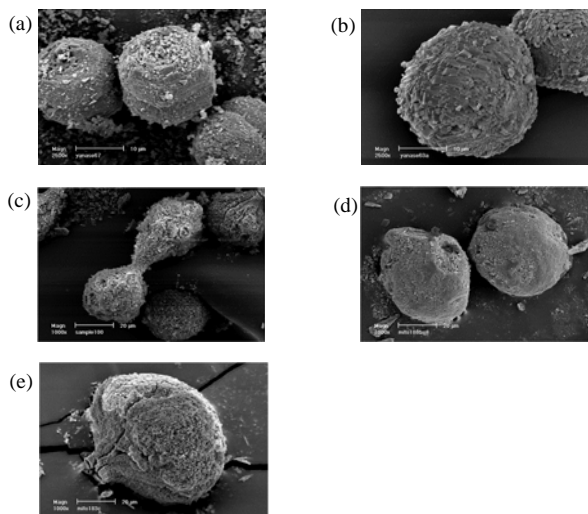

**Fig. S1** SEM images of: (a) SAPO-5 (0.6TEOS), (b) MeSi- $\text{AlPO}_4\text{-5}$  (0.6MTES), (c) VPI-5, (d) bisSi-VPI-5 (0.15BTESM), (e) MeSi-VPI-5 (0.15MTES).

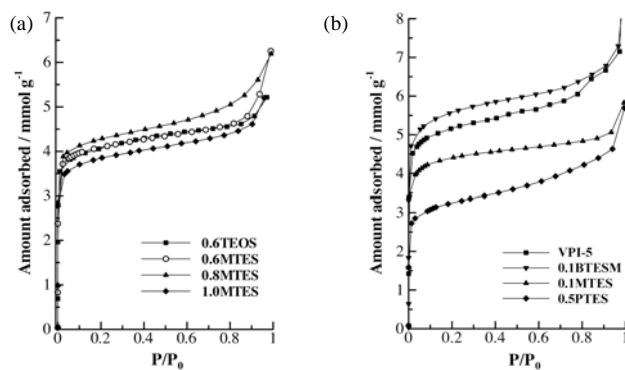

**Fig. S2** Nitrogen adsorption isotherms at 77 K of: organosilyl-substituted (a)  $\text{AlPO}_4\text{-5}$  and (b) VPI-5.

### Preparation procedures of the organosilyl-substituted $\text{AlPO}_4\text{-5}$ and VPI-5

#### Organosilyl-substituted $\text{AlPO}_4\text{-5}$

The composition of the starting gel for AFI synthesis was  $x\text{OAS}\cdot 1\text{Al}_2\text{O}_3\cdot (1.3-x/2)\text{P}_2\text{O}_5\cdot 1\text{Et}_3\text{N}\cdot 40\text{H}_2\text{O}$  ( $x=0.6\text{--}2.0$ ). The gel was typically prepared as follows: A mixture of pseudo-boehmite and water were stirred for 5 min. After phosphoric acid was added, the mixture was stirred for 60 min. After  $\text{Et}_3\text{N}$  was added, the mixture was stirred for 90 min. After an organoalkoxysilane was added, the mixture was stirred for 10 min. The gel was hydrothermally reacted at  $200^\circ\text{C}$  for 18 h in a Teflon-lined autoclave. The template occluded in the product was removed with  $\text{HCl}/\text{MeOH}$  at  $100^\circ\text{C}$  for 20 h in a Teflon-lined autoclave.

#### Organosilyl-substituted VPI-5

The composition of the starting gel for VFI synthesis was  $x\text{OAS}\cdot 1\text{Al}_2\text{O}_3\cdot 1\text{P}_2\text{O}_5\cdot 1\text{Pr}_2\text{NH}\cdot 40\text{H}_2\text{O}$  ( $x=0.1\text{--}0.5$ ). The gel was typically prepared as follows: A mixture of pseudo-boehmite and water were stirred for 30 min. After phosphoric acid was added, the mixture was stirred for another 30 min. After the gel was aged for 24 h at an ambient temperature,  $\text{Pr}_2\text{NH}$  was added and stirred for 1 h. After an organoalkoxysilane was added, the mixture was stirred for 2 h. The gel was hydrothermally reacted at  $140^\circ\text{C}$  for 24 h in a Teflon-lined autoclave. The template occluded in the product was removed with  $\text{HCl}/\text{MeOH}$  at  $100^\circ\text{C}$  for 16 h in a Teflon-lined autoclave.
